# Supplementary material for: Coexistence of Nerve Enlargement and Neuratrophy Detected by Ultrasonography in Leprosy Patients
Source: PubMed Central journal article supplement (PMC5958074; doi:10.1038/s41598-018-26085-1), 2018-05-17
Supplement: 41598_2018_26085_MOESM1_ESM.pdf [file 41598_2018_26085_MOESM1_ESM.pdf]

1 **Coexistence of Nerve Enlargement and Neuratrophy Detected by Ultrasonography in**

2 **Leprosy Patients**

3

4 Xiaohua Chen<sup>1,2</sup>, Liangfu Zhang<sup>2,3</sup>, Meiyong Huang<sup>2,3</sup>, Xiuli Zhai<sup>2,3</sup>, Yan Wen<sup>1,2\*</sup>, Chunzhi  
5 Pan<sup>2,4</sup>

6

7 <sup>1</sup> Beijing Tropical Medicine Research Institute, Beijing Friendship Hospital, Capital Medical  
8 University, Beijing 100050, China

9 <sup>2</sup> Beijing Key Laboratory for Research on Prevention and Treatment of Tropical Diseases,  
10 Capital Medical University, Beijing 100050, China

11 <sup>3</sup> Sanya Leprosy Prevention and Control Center, Sanya, Hainan 572000, China

12 <sup>4</sup> China Leprosy Association, Beijing 100068, China

13

14 **\* Corresponding author**

15 Yan Wen

16 Tel.: +86-10-83168482

17 E-mail: weny8@163.com

18

19

| Nerves             |       | CSA       | Leprosy     | Controls    | Classification |             | Reaction    |             | Disability  |             | Duration    |             |
|--------------------|-------|-----------|-------------|-------------|----------------|-------------|-------------|-------------|-------------|-------------|-------------|-------------|
|                    |       |           |             |             | MB             | PB          | R           | NR          | D           | ND          | Longer      | Shorter     |
| M<br>(forearm 1/2) | left  | mean(mm2) | 0.092       | 0.084       | 0.091          | 0.094       | 0.098       | 0.091       | 0.093       | 0.091       | 0.093       | 0.090       |
|                    |       | SD(mm2)   | 0.031       | 0.021       | 0.032          | 0.031       | 0.029       | 0.032       | 0.029       | 0.038       | 0.034       | 0.021       |
|                    |       | n         | 71          | 29          | 34             | 37          | 8           | 63          | 51          | 20          | 53          | 18          |
|                    |       | 95% CI    | 0.085-0.100 | 0.076-0.092 | 0.079-0.102    | 0.083-0.104 | 0.073-0.122 | 0.083-0.099 | 0.084-0.101 | 0.073-0.109 | 0.083-0.102 | 0.079-0.101 |
|                    | right | mean(mm2) | 0.086       | 0.081       | 0.084          | 0.088       | 0.078       | 0.087       | 0.086       | 0.087       | 0.083       | 0.096       |
|                    |       | SD(mm2)   | 0.031       | 0.020       | 0.033          | 0.030       | 0.024       | 0.032       | 0.030       | 0.036       | 0.031       | 0.032       |
|                    |       | n         | 71          | 29          | 34             | 37          | 8           | 63          | 51          | 20          | 53          | 18          |
|                    |       | 95% CI    | 0.079-0.094 | 0.074-0.089 | 0.072-0.095    | 0.078-0.098 | 0.058-0.097 | 0.079-0.095 | 0.078-0.094 | 0.070-0.103 | 0.075-0.091 | 0.079-0.112 |
| M<br>(forearm 1/3) | left  | mean(mm2) | 0.0906      | 0.0697      | 0.0835         | 0.0970      | 0.1275      | 0.0859      | 0.0837      | 0.1080      | 0.0945      | 0.0789      |
|                    |       | SD(mm2)   | 0.0414      | 0.0186      | 0.0285         | 0.0500      | 0.0891      | 0.0290      | 0.0261      | 0.0639      | 0.0458      | 0.0208      |
|                    |       | n         | 71          | 29          | 34             | 37          | 8           | 63          | 51          | 20          | 53          | 18          |
|                    |       | 95% CI    | 0.081-0.100 | 0.063-0.077 | 0.074-0.093    | 0.080-0.114 | 0.053-0.202 | 0.079-0.093 | 0.076-0.091 | 0.078-0.138 | 0.082-0.107 | 0.069-0.089 |
|                    | right | mean(mm2) | 0.0883      | 0.0724      | 0.0885         | 0.0881      | 0.1125      | 0.0852      | 0.0837      | 0.1000      | 0.0896      | 0.0844      |
|                    |       | SD(mm2)   | 0.0373      | 0.0172      | 0.0395         | 0.0357      | 0.0618      | 0.0324      | 0.0338      | 0.0438      | 0.0386      | 0.0336      |
|                    |       | n         | 71          | 29          | 34             | 37          | 8           | 63          | 51          | 20          | 53          | 18          |
|                    |       | 95% CI    | 0.079-0.097 | 0.066-0.079 | 0.075-0.102    | 0.076-0.100 | 0.061-0.164 | 0.077-0.093 | 0.074-0.093 | 0.080-0.121 | 0.079-0.100 | 0.068-0.101 |
| U(Ut)              | left  | mean(mm2) | 0.107       | 0.099       | 0.099          | 0.114       | 0.158       | 0.101       | 0.103       | 0.118       | 0.112       | 0.093       |
|                    |       | SD(mm2)   | 0.045       | 0.030       | 0.032          | 0.054       | 0.092       | 0.031       | 0.037       | 0.060       | 0.049       | 0.024       |
|                    |       | n         | 71          | 29          | 34             | 37          | 8           | 63          | 51          | 20          | 53          | 18          |
|                    |       | 95% CI    | 0.097-0.118 | 0.088-0.111 | 0.088-0.111    | 0.096-0.132 | 0.081-0.234 | 0.093-0.109 | 0.093-0.114 | 0.089-0.146 | 0.098-0.126 | 0.082-0.105 |
|                    | right | mean(mm2) | 0.111       | 0.089       | 0.099          | 0.122       | 0.176       | 0.103       | 0.102       | 0.136       | 0.117       | 0.094       |
|                    |       | SD(mm2)   | 0.049       | 0.023       | 0.037          | 0.057       | 0.102       | 0.031       | 0.033       | 0.073       | 0.055       | 0.020       |
|                    |       | n         | 71          | 29          | 34             | 37          | 8           | 63          | 51          | 20          | 53          | 18          |
|                    |       | 95% CI    | 0.100-0.123 | 0.081-0.098 | 0.086-0.112    | 0.103-0.141 | 0.091-0.262 | 0.095-0.111 | 0.092-0.111 | 0.102-0.170 | 0.102-0.132 | 0.084-0.104 |
| U(Upt)             | left  | mean(mm2) | 0.132       | 0.091       | 0.109          | 0.153       | 0.263       | 0.115       | 0.122       | 0.158       | 0.142       | 0.102       |
|                    |       | SD(mm2)   | 0.095       | 0.021       | 0.041          | 0.123       | 0.217       | 0.050       | 0.080       | 0.124       | 0.103       | 0.061       |
|                    |       | n         | 71          | 29          | 34             | 37          | 8           | 63          | 51          | 20          | 53          | 18          |
|                    |       | 95% CI    | 0.109-0.155 | 0.083-0.099 | 0.095-0.111    | 0.112-0.194 | 0.081-0.444 | 0.103-0.128 | 0.099-0.144 | 0.100-0.216 | 0.114-0.171 | 0.071-0.132 |

|        |       |           |             |             |             |             |             |             |             |             |             |             |
|--------|-------|-----------|-------------|-------------|-------------|-------------|-------------|-------------|-------------|-------------|-------------|-------------|
| U(Upt) | right | mean(mm2) | 0.129       | 0.091       | 0.111       | 0.147       | 0.254       | 0.114       | 0.116       | 0.163       | 0.143       | 0.090       |
|        |       | SD(mm2)   | 0.082       | 0.024       | 0.041       | 0.104       | 0.180       | 0.041       | 0.059       | 0.118       | 0.090       | 0.025       |
|        |       | n         | 71          | 29          | 34          | 37          | 8           | 63          | 51          | 20          | 53          | 18          |
|        |       | 95% CI    | 0.110-0.149 | 0.082-0.101 | 0.096-0.125 | 0.112-0.181 | 0.104-0.404 | 0.103-0.124 | 0.100-0.133 | 0.107-0.218 | 0.118-0.168 | 0.078-0.102 |
| CF     | left  | mean(mm2) | 0.279       | 0.303       | 0.249       | 0.301       | 0.311       | 0.274       | 0.283       | 0.269       | 0.256       | 0.347       |
|        |       | SD(mm2)   | 0.114       | 0.076       | 0.071       | 0.135       | 0.114       | 0.115       | 0.117       | 0.110       | 0.091       | 0.151       |
|        |       | n         | 65          | 29          | 28          | 37          | 8           | 57          | 45          | 20          | 49          | 16          |
|        |       | 95% CI    | 0.250-0.307 | 0.275-0.332 | 0.222-0.277 | 0.256-0.346 | 0.216-0.406 | 0.244-0.305 | 0.248-0.318 | 0.217-0.320 | 0.230-0.282 | 0.266-0.428 |
|        | right | mean(mm2) | 0.258       | 0.299       | 0.243       | 0.272       | 0.314       | 0.251       | 0.254       | 0.269       | 0.246       | 0.297       |
|        |       | SD(mm2)   | 0.098       | 0.073       | 0.069       | 0.118       | 0.194       | 0.077       | 0.076       | 0.139       | 0.104       | 0.065       |
|        |       | n         | 68          | 29          | 32          | 36          | 8           | 60          | 48          | 20          | 52          | 16          |
|        |       | 95% CI    | 0.234-0.282 | 0.271-0.327 | 0.218-0.268 | 0.232-0.312 | 0.151-0.476 | 0.231-0.271 | 0.232-0.276 | 0.203-0.334 | 0.217-0.275 | 0.263-0.331 |

Supplementary Table S1. The results of CSAs of peripheral nerves in different groups shows as mean,SD,n and 95% confidence interval. Patients were classified according to the clinic characters, involving leprosy/controls,WHO classification,reaction,disability and duration.n: number of nerves;SD: standard deviation; CI:confidence interval. M:median;U:ulnar;CF:common feblar;R:reaction;NR:no-reaction;D:disability;ND:no-disability.

|                 |         |                    | Classification |         |             |             | Reaction |         |            |             | Disability |         |            |             | Duration |                  |                  |                 |
|-----------------|---------|--------------------|----------------|---------|-------------|-------------|----------|---------|------------|-------------|------------|---------|------------|-------------|----------|------------------|------------------|-----------------|
| Nerve s         | P-value | Leprosy - controls | total          | MB-PB   | MB-Controls | PB-Controls | Total    | R-NR    | R-controls | NR-controls | Total      | D-ND    | D-Controls | ND-Controls | Total    | Longer - shorter | Shorter-controls | Longer-controls |
| M (forearm 1/2) | total   | 0.5131             | 0.6220         |         |             |             | 0.6034   |         |            |             | 0.5753     |         |            |             | 0.6588   |                  |                  |                 |
|                 | left    | 0.3720             | 0.5686         | 0.6387  | 0.7014      | 0.2479      | 0.5537   | 0.5962  | 0.2703     | 0.4631      | 0.3754     | 0.4361  | 0.2290     | 0.9672      | 0.4522   | 0.1886           | 0.2735           | 0.8812          |
|                 | right   | 0.7559             | 0.6307         | 0.3838  | 0.8453      | 0.4713      | 0.6328   | 0.4044  | 0.4986     | 0.6165      | 0.7892     | 0.6799  | 0.6525     | 0.9424      | 0.8633   | 0.9881           | 0.1951           | 0.6807          |
| M (forearm 1/3) | total   | 0.0052*            | 0.0130         |         |             |             | 0.0060   |         |            |             | 0.0013*    |         |            |             | 0.0106*  |                  |                  |                 |
|                 | left    | 0.0045*            | 0.0078         | 0.2302  | 0.0741      | 0.0016*     | 0.0040   | 0.0777  | 0.0048*    | 0.0124      | 0.0037*    | 0.0818  | 0.0279*    | 0.0017*     | 0.0058*  | 0.1114           | 0.1964           | 0.0023*         |
|                 | right   | 0.0394*            | 0.1187         | 0.9908  | 0.0907      | 0.0547      | 0.0816   | 0.3196  | 0.1196     | 0.0544      | 0.0132*    | 0.1276  | 0.1804     | 0.0051*     | 0.1050   | 0.5903           | 0.2130           | 0.0378*         |
| U (Ut)          | total   | 0.1166             | 0.0352*        |         |             |             | 0.0187*  |         |            |             | 0.0325*    |         |            |             | 0.0543   |                  |                  |                 |
|                 | left    | 0.7368             | 0.5261         | 0.2951  | 0.7973      | 0.4123      | 0.2114   | 0.0867  | 0.1112     | 0.9966      | 0.9285     | 0.3964  | 0.9398     | 0.4609      | 0.3347   | 0.1650           | 0.4325           | 0.4357          |
|                 | right   | 0.0158*            | 0.0043*        | 0.0464* | 0.4830      | 0.0006*     | 0.0052*  | 0.0207* | 0.0066*    | 0.0406*     | 0.0024*    | 0.0298* | 0.1079     | 0.0014*     | 0.0128*  | 0.0816           | 0.4779           | 0.0057*         |
| U (Upt)         | total   | 0.0022*            | 0.0019*        |         |             |             | <0.0001* |         |            |             | 0.0011*    |         |            |             | <0.0001* |                  |                  |                 |
|                 | left    | 0.0103*            | 0.0213*        | 0.2473  | 0.0618      | 0.0089*     | 0.0047*  | 0.0307* | 0.0057*    | 0.0274*     | 0.0114*    | 0.0936  | 0.0571     | 0.0027*     | 0.0003*  | 0.0036*          | 0.6818           | 0.0005*         |
|                 | right   | 0.0050*            | 0.0046*        | 0.1317  | 0.1146      | 0.0010*     | 0.0004*  | 0.0037* | 0.0006*    | 0.0201*     | 0.0036*    | 0.0763  | 0.0257*    | 0.0028*     | <0.0001  | 0.0005*          | 0.6257           | 0.0001*         |
| CF              | total   | 0.0325*            | 0.0193*        |         |             |             | 0.0910   |         |            |             | 0.1175     |         |            |             | 0.0003*  |                  |                  |                 |
|                 | left    | 0.0905             | 0.0301*        | 0.0755  | 0.0051*     | 0.6884      | 0.1629   | 0.3477  | 0.7107     | 0.0730      | 0.2356     | 0.6084  | 0.1231     | 0.1723      | 0.0044*  | 0.0066*          | 0.3796           | 0.0115*         |
|                 | right   | 0.0264*            | 0.0522         | 0.3927  | 0.0112*     | 0.1634      | 0.0833   | 0.9469  | 0.3461     | 0.0252*     | 0.0842     | 0.6861  | 0.0377*    | 0.0889      | 0.0024*  | 0.0084*          | 0.7486           | 0.0036*         |

Supplementary Table S2. The results of statistical analysis of CSAs of peripheral nerves in different groups shows as p value. Patients were classified according to the clinic characters, involving leprosy-controls, WHO classification, reaction, disability and treatment duration. M: median; U: ulnar; CF: common febrular; R: reaction; NR: no-reaction; D: disability; ND: no-disability. p-value by Kruskal-Wallis test and Mann-Whitney U test. \* Statistically significant.

|                    |                | Group(n)    | TT          | BT          | BB           | BL          | LL          | p-value |
|--------------------|----------------|-------------|-------------|-------------|--------------|-------------|-------------|---------|
| Variable           | Nerve          | Patients    | 26          | 8           | 6            | 8           | 23          |         |
| CSA (mm2)          | M(forearm1/2)  | n           | 52          | 16          | 12           | 16          | 46          | 0.1847  |
|                    |                | mean        | 0.091       | 0.076       | 0.083        | 0.094       | 0.092       |         |
|                    |                | SD          | 0.033       | 0.030       | 0.019        | 0.029       | 0.033       |         |
|                    |                | 95% CI      | 0.081-0.100 | 0.060-0.092 | 0.070-0.095  | 0.079-0.110 | 0.082-0.102 |         |
|                    |                | abnormal    | 9           | 2           | 1            | 1           | 6           |         |
|                    | M (forearm1/3) | n           | 52          | 16          | 12           | 16          | 46          | 0.4215  |
|                    |                | mean        | 0.085       | 0.089       | 0.103        | 0.084       | 0.093       |         |
|                    |                | SD          | 0.036       | 0.030       | 0.037        | 0.021       | 0.050       |         |
|                    |                | 95% CI      | 0.075-0.095 | 0.074-0.105 | 0.080-0.127  | 0.073-0.095 | 0.078-0.108 |         |
|                    |                | abnormal    | 10          | 3           | 5            | 4           | 12          |         |
|                    | U(Ut)          | n           | 52          | 16          | 12           | 16          | 46          | 0.2040  |
|                    |                | mean        | 0.100       | 0.099       | 0.118        | 0.103       | 0.124       |         |
|                    |                | SD          | 0.033       | 0.039       | 0.035        | 0.021       | 0.066       |         |
|                    |                | 95% CI      | 0.090-0.109 | 0.078-0.120 | 0.096-0.140  | 0.091-0.114 | 0.104-0.143 |         |
|                    |                | abnormal    | 1           | 1           | 2            | 1           | 6           |         |
|                    | U(Upt)         | n           | 52          | 16          | 12           | 16          | 46          | 0.1486  |
|                    |                | mean        | 0.111       | 0.107       | 0.110        | 0.124       | 0.169       |         |
|                    |                | SD          | 0.042       | 0.039       | 0.039        | 0.047       | 0.136       |         |
|                    |                | 95% CI      | 0.099-0.122 | 0.086-0.128 | 0.085-0.135  | 0.099-0.149 | 0.129-0.210 |         |
|                    |                | abnormal    | 10          | 4           | 1            | 6           | 14          |         |
| CF                 | n              | 44          | 16          | 12          | 16           | 45          | 0.0108*     |         |
|                    | mean           | 0.250       | 0.231       | 0.244       | 0.341        | 0.278       |             |         |
|                    | SD             | 0.070       | 0.077       | 0.056       | 0.100        | 0.143       |             |         |
|                    | 95% CI         | 0.231-0.271 | 0.190-0.273 | 0.209-0.279 | 0.287-0.394  | 0.235-0.322 |             |         |
|                    | abnormal       | 0           | 0           | 0           | 0            | 3           |             |         |
| $\Delta$ CSA (mm2) | M(forearm1/2)  | n           | 26          | 8           | 6            | 8           | 23          | 0.0968  |
|                    |                | mean        | 0.024       | 0.010       | 0.012        | 0.011       | 0.034       |         |
|                    |                | SD          | 0.021       | 0.012       | 0.012        | 0.014       | 0.037       |         |
|                    |                | 95% CI      | 0.016-0.033 | 0.000-0.020 | -0.001-0.024 | 0.000-0.023 | 0.019-0.050 |         |
|                    |                | abnormal    | 9           | 0           | 0            | 1           | 6           |         |

|                                 |                |          |             |             |              |              |             |        |
|---------------------------------|----------------|----------|-------------|-------------|--------------|--------------|-------------|--------|
| $\Delta$ CSA (mm <sup>2</sup> ) | M (forearm1/3) | n        | 26          | 8           | 6            | 8            | 23          | 0.3725 |
|                                 |                | mean     | 0.022       | 0.021       | 0.027        | 0.009        | 0.030       |        |
|                                 |                | SD       | 0.028       | 0.023       | 0.038        | 0.006        | 0.034       |        |
|                                 |                | 95% CI   | 0.011-0.034 | 0.002-0.040 | -0.013-0.066 | 0.003-0.014  | 0.015-0.044 |        |
|                                 |                | abnormal | 4           | 3           | 0            | 0            | 4           |        |
|                                 | U(Ut)          | n        | 26          | 8           | 6            | 8            | 23          | 0.9545 |
|                                 |                | mean     | 0.027       | 0.030       | 0.017        | 0.023        | 0.033       |        |
|                                 |                | SD       | 0.023       | 0.036       | 0.014        | 0.017        | 0.053       |        |
|                                 |                | 95% CI   | 0.018-0.036 | 0.000-0.060 | 0.002-0.031  | 0.009-0.036  | 0.011-0.056 |        |
|                                 |                | abnormal | 3           | 2           | 0            | 0            | 3           |        |
|                                 | U(Upt)         | n        | 26          | 8           | 6            | 8            | 23          | 0.0939 |
|                                 |                | mean     | 0.030       | 0.041       | 0.040        | 0.013        | 0.034       |        |
|                                 |                | SD       | 0.036       | 0.025       | 0.027        | 0.016        | 0.043       |        |
|                                 |                | 95% CI   | 0.016-0.045 | 0.020-0.062 | 0.012-0.068  | 0.001-0.026  | 0.016-0.053 |        |
|                                 |                | abnormal | 4           | 3           | 0            | 0            | 3           |        |
|                                 | CF             | n        | 19          | 8           | 6            | 8            | 22          | 0.4916 |
|                                 |                | mean     | 0.038       | 0.065       | 0.025        | 0.081        | 0.076       |        |
|                                 |                | SD       | 0.030       | 0.054       | 0.014        | 0.131        | 0.118       |        |
|                                 |                | 95% CI   | 0.023-0.053 | 0.020-0.110 | 0.011-0.039  | -0.028-0.191 | 0.024-0.128 |        |
|                                 |                | abnormal | 1           | 3           | 0            | 0            | 7           |        |
| $\Delta$ Utp <sub>t</sub>       | U(Ut and Upt)  | n        | 52          | 16          | 12           | 16           | 46          | 0.4560 |
|                                 |                | mean     | 0.031       | 0.036       | 0.028        | 0.018        | 0.034       |        |
|                                 |                | SD       | 0.029       | 0.031       | 0.024        | 0.017        | 0.047       |        |
|                                 |                | 95% CI   | 0.023-0.039 | 0.019-0.052 | 0.013-0.043  | 0.009-0.026  | 0.020-0.048 |        |
|                                 |                | abnormal | 5           | 3           | 1            | 0            | 4           |        |

Supplementary Table S3. CSAs,  $\Delta$ CSAs and  $\Delta$ Utp<sub>t</sub> results. Patients were classified according to the Ridley-Jopling classification. n: number of nerves;SD: standard deviation; CI:confidence interval. M:median;U:ulnar;CF:common febrular.\* Statistically significant.
